# Supplementary material
Source: PubMed Central journal article supplement (PMC2782268)
Supplement: tpc.109.070334_1.pdf [file tpc.109.070334_1.pdf]

**Supplemental Data, Jeuken et al., (2009) Rin4 causes hybrid necrosis and race-specific resistance in an interspecific lettuce hybrid.”**

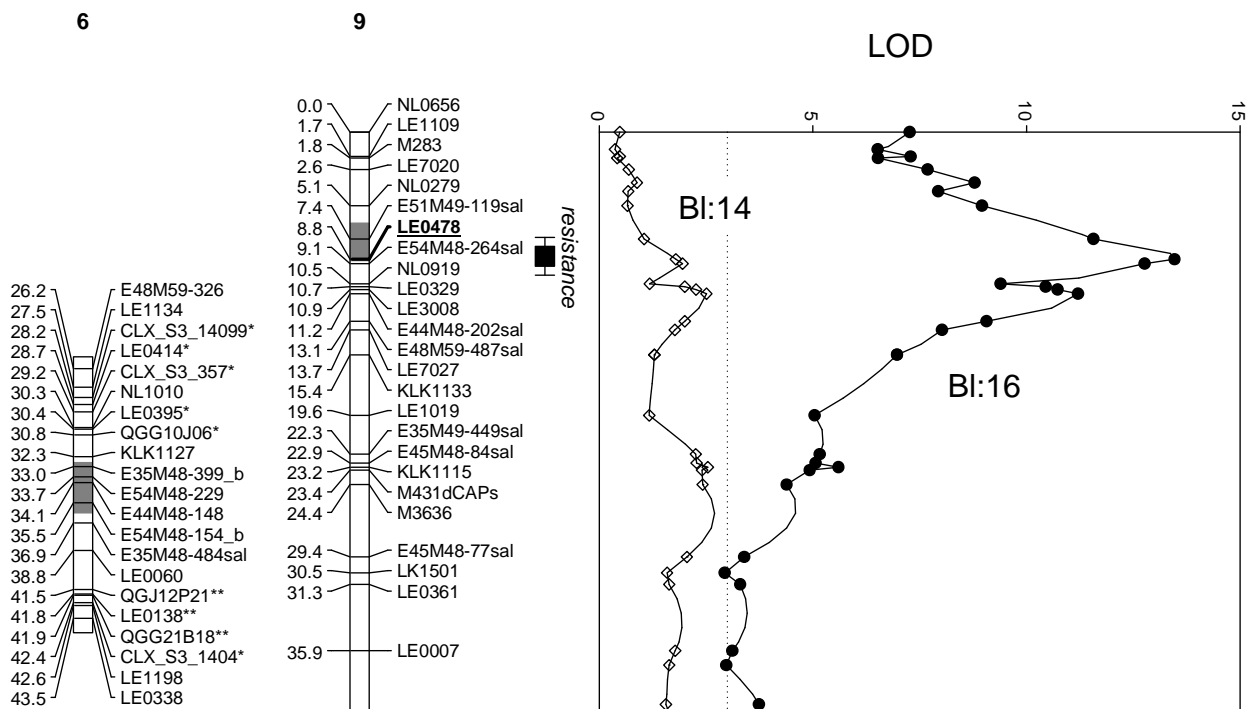

**Supplemental Figure 1. Map positions of hybrid necrosis loci.**

Genetic maps with the two interactive loci on chromosome 6 and 9 (C6 and C9) and the LOD profile for race-specific resistance on C9 to *B. lactuca* BI:16 (formerly designated *R39*) are shown. The genetic map and chromosomal designations are based on analysis of a  $F_2$  *L. saligna* x *L. sativa* population (Jeuken et al., 2001). Note that chromosome 6 of this map corresponds to chromosome 8 of the consensus map of *Lactuca* spp. (Truco et al., 2007); chromosome 9 is the same in both maps. The grey bars show the two smallest fine mapped segments that are associated with hybrid necrosis based on  $F_2$  populations and introgression lines from cross 1 and 2. \* = Markers that are based on EST sequences with sequence similarity to Resistance Gene Candidates encoding NBS-LRR proteins (McHale et al., 2009). \*\*= Marker that is based on an EST sequence with sequence similarity to MLO (Mildew-resistance LOcus gene in barley). The LOD profiles of race-specific resistance to *B. lactuca* BI:16 (solid bullets) and susceptibility to BI:14 (open diamonds) are shown for C9 with one LOD and two LOD support confidence intervals (approximate multiple QTL mapping, MQM). The highest

associated marker is underlined and bold. The marker LE0478 that was most tightly associated with the peak on chromosome 9 is underlined and in bold. LE0478, derived from a lettuce unigene with sequence similarity to *Arabidopsis RIN4*, and its derived markers (LE0478INT, LE0478indel not shown) all mapped to the same position.

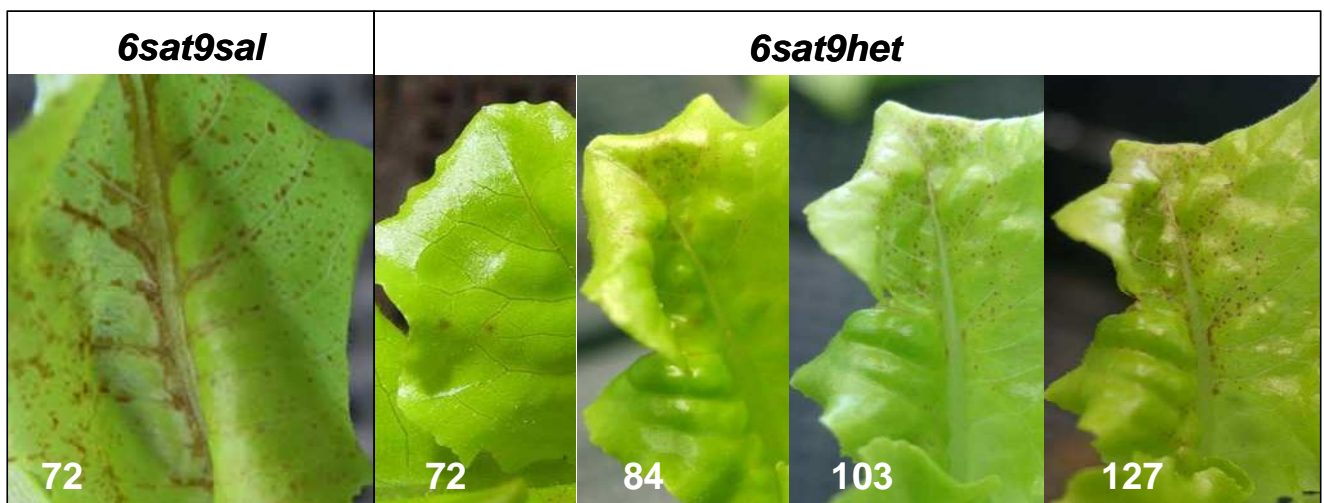

**Supplemental Figure 2. Hybrid necrosis symptoms in youngest leaf after temperature shift.** Observations on genotype classes with extreme to severe hybrid necrosis symptoms at lower temperatures are shown: *6sat9sal* and *6sat9het*, in hours after shift from 30° to 15°C. Left: detail of necrotic cells in *6sat9sal* appearing near the major veins. Right: time frame of appearance of necrotic lesions in a *6sat9het* leaf.

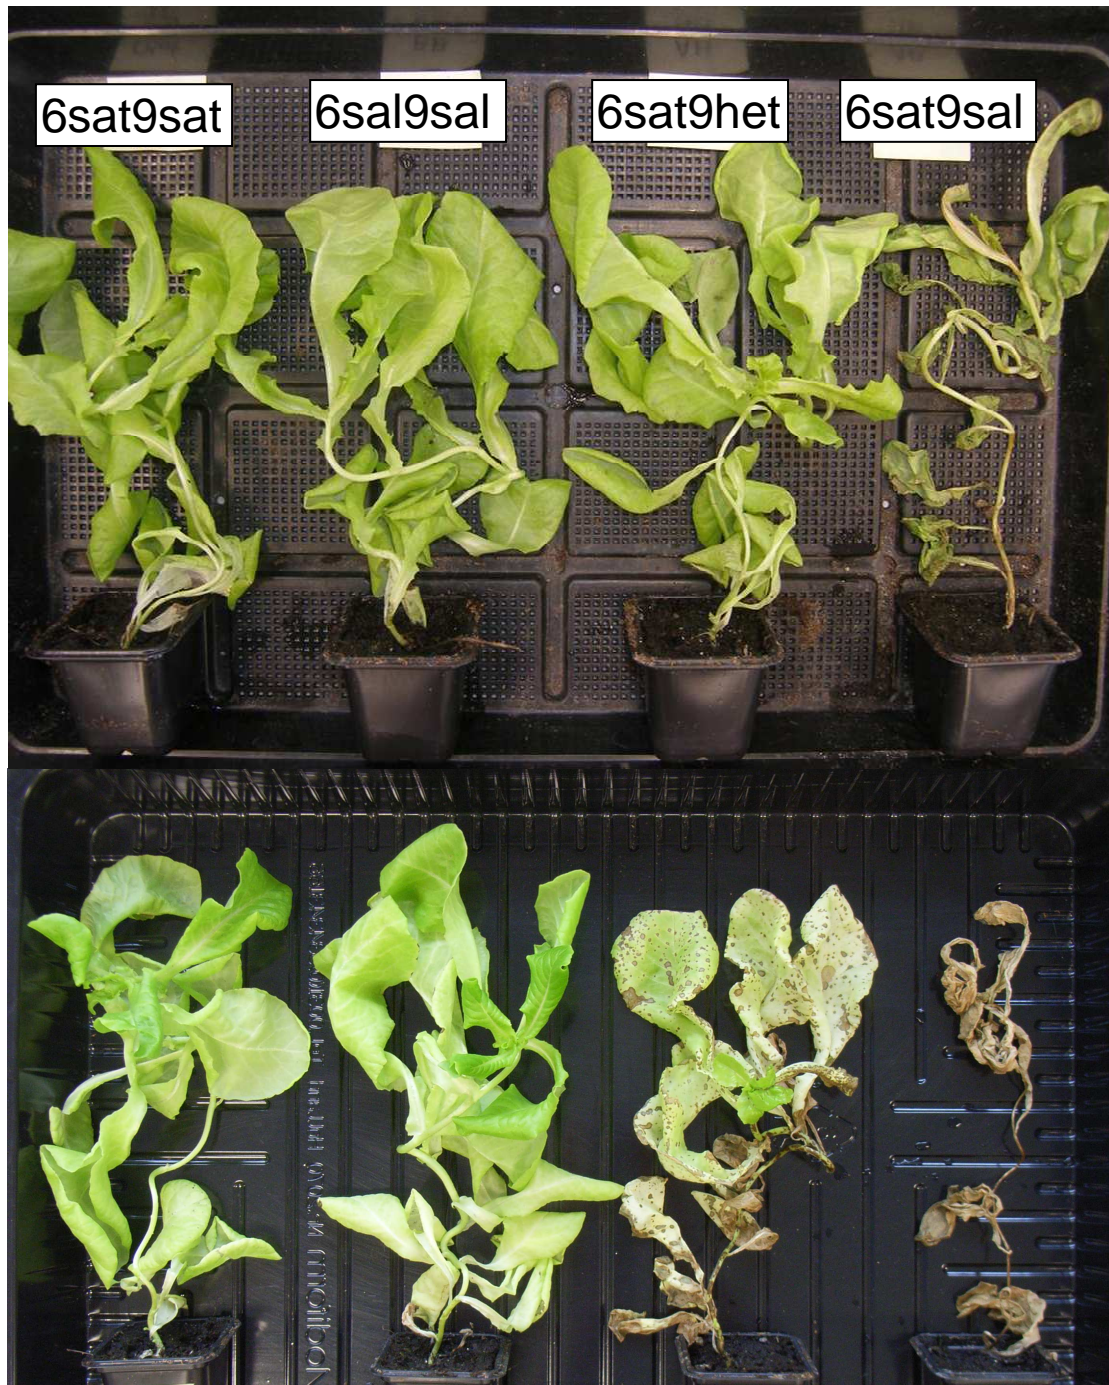

**Supplemental Figure 3. Hybrid necrosis symptoms in whole plants after temperature shift.** Observations on genotype classes with severe to extreme hybrid necrosis symptoms at lower temperatures: *6sat9het* and *6sat9sal*, and genotypes with no hybrid necrosis symptoms: *6sat9sat* *L. sativa* cv. Olof and *6sal9sal*/doubleBIL6.1+9.1, are shown at 5 and 17 days after a shift from 30° to 15°C.

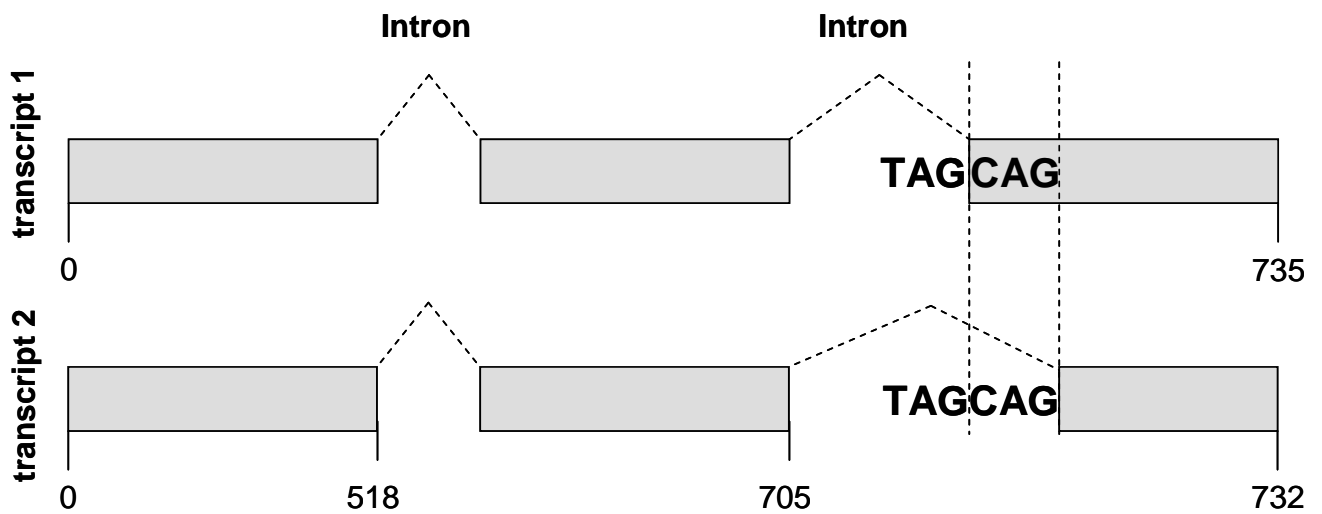

**Supplemental Figure 4. Proposed alternative splicing of *Rin4* transcripts.**

The proposed alternative splicing events that utilize different 3'splice sites within the last intron at a 'TAGCAG' sequence leading to two transcript versions in *L. sativa*, *L. saligna* and *L. virosa* are shown. Transcript1 and transcript2 arose from a splice after the 'TAG' and the 'CAG' motif, respectively. This results in one extra amino acid, namely glutamine at position 237 in transcript1.

# A

Lsaligna\_FRA-ITA\_consensus MAQRPTVPKFGNWESEDNVPYTVYFDKARKKGTGGKMINPNDPQENPEMFADKTPPTPRSRPQPEEPVGRRAVRPSRENE 82  
Lsaligna\_RUS-GEO\_consensus MAQRPTVPKFGNWESEDNVPYTVYFDKARKKGTGGKMINPNDPQENPEMFADKTPPTPRSRPQPEEPVGRRAVRPSRENE 82  
Lsaligna\_ISR-ISR\_consensus MAQRPTVPKFGNWESEDNVPYTVYFDKARKKGTGGKMINPNDPQENPEMFADKTPPTPRSRPQPEEPVGRRAVRPSRENE 82  
Lvirosa\_consensus MAQRPTVPKFGNWESEDNVPYTVYFDKARKKGTGGKMINPNDPQENPEMFADKTPPTPRSRPQPEEPVGRRAVRPSRENE 82  
Laculeata\_consensus MAQRPTVPKFGNWESEDNVPYTVYFDKARKKGTGGKMINPNDPQENPEMFADKTPPTPRSRPQPEEPVGRRAVRPSRENE 82  
Laltaica\_consensus MAQRPTVPKFGNWESEDNVPYTVYFDKARKKGTGGKMINPNDPQENPEMFADKTPPTPRSRPQPEEPVGRRAVRPSRENE 82  
Ldregeana\_consensus MAQRPTVPKFGNWESEDNVPYTVYFDKARKKGTGGKMINPNDPQENPEMFADKTPPTPRSRPQPEEPVGRRAVRPSRENE 82  
Lsativa\_consensus MAQRPTVPKFGNWESEDNVPYTVYFDKARKKGTGGKMINPNDPQENPEMFADKTPPTPRSRPQPEEPVGRRAVRPSRENE 82  
Lserriola\_consensus MAQRPTVPKFGNWESEDNVPYTVYFDKARKKGTGGKMINPNDPQENPEMFADKTPPTPRSRPQPEEPVGRRAVRPSRENE 82  
Ltatarica\_CGN09390\_T2a MAQRPTVPKFGNWESEDNVPYTVYFDKARKKGTGGKMINPNDPQENPEMFADKTPPTPRSRPQPEEPVGRRAVRPSRENE 82  
Ltatarica\_CGN09390\_T2b MAQRPTVPKFGNWESEDNVPYTVYFDKARKKGTGGKMINPNDPQENPEMFADKTPPTPRSRPQPEEPVGRRAVRPSRENE 82  
Lvimineae\_CGN16202 MAQRPTVPKFGNWESEDNVPYTVYFDKARKKGTGGKMINPNDPQENPEMFADKTPPTAHRSRQPEEPVGRRAVRPSRENE 82  
Lvimineae\_CGN17401 MAQRPTVPKFGNWESEDNVPYTVYFDKARKKGTGGKMINPNDPQENPEMFADKTPPTAHRSRQPEEPVGRRAVRPSRENE 82  
Lindica\_consensus MAQRPTVPKFGNWESEDNVPYTVYFDKARKKGTGGKMINPNDPQENPEMFADKTPPTPRSRPQPEEPVGRRAVRPSRENE 82  
Lperennis\_CGN09323 MAQRPTVPKFGNWESEDNVPYTVYFDKARKKGTGGKMINPNDPQENPEMFADKTPPTPRSRPQPEEPVGRRAVRPSRENE 82  
Ltenerima\_CGN09386 MAQRPTVPKFGNWESEDNVPYTVYFDKARKKGTGGKMINPNDPQENPEMFADKTPPTPRSRPQPEEPVGRRAVRPSRENE 82

Lsaligna\_FRA-ITA\_consensus YQPPNDIAGRRITSGGSAYQRGGQGTAAAGRPVKISAGSENSFDRSPLHPHYQAK--VAAGKGSQSPAYEGKNSYDSSHGTPSR162  
Lsaligna\_RUS-GEO\_consensus YQPPNDIAGRRITSGGSAYQRGGQGTAAAGRPVKISAGSENSFDRSPLHPHYQAK--VAAGKGSQSPAYEGKNSYDSSHGTPSR162  
Lsaligna\_ISR-ISR\_consensus YQPPNDIAGRRITSGGSAYQRGGQGTAAAGRPVKISAGSENSFDRSPLHPHYQAK--VAAGKGSQSPAYEGKNSYDSSHGTPSR162  
Lvirosa\_consensus YQPPNDIAGRRITSGGSAYQRGGQGTAAAGRPVKISAGSENSFDRSPLHPHYQAK--VTAGKGSQSPAYEGKNSYDSSHGTPSR162  
Laculeata\_consensus YQPPNDIAGRRITSGGSAYQRGGQGTAAAGRPVKISAGSENSFDRSPLHPHYQAK--VAAGKGSQSPAYEGKNSYDSSHGTPSR162  
Laltaica\_consensus YQPPNDIAGRRITSGGSAYQRGGQGTAAAGRPVKISAGSENSFDRSPLHPHYQAK--VAAGKGSQSPAYEGKNSYDSSHGTPSR162  
Ldregeana\_consensus YQPPNDIAGRRITSGGSAYQRGGQGTAAAGRPVKISAGSENSFDRSPLHPHYQAK--VAAGKGSQSPAYEGKNSYDSSHGTPSR162  
Lsativa\_consensus YQPPNDIAGRRITSGGSAYQRGGQGTAAAGRPVKISAGSENSFDRSPLHPHYQAK--VAAGKGSQSPAYEGKNSYDSSHGTPSR162  
Lserriola\_consensus YQPPNDIAGRRITSGGSAYQRGGQGTAAAGRPVKISAGSENSFDRSPLHPHYQAK--VAAGKGSQSPAYEGKNSYDSSHGTPSR162  
Ltatarica\_CGN09390\_T2a YQPPNDIAGRRITSGGSAYQRGGQGTAAAGRPVKISAGSENSFDRSPLHPHYQAK--VAAGKGSQSPAYEGKNSYDSSHGTPSR162  
Ltatarica\_CGN09390\_T2b YQPPNDIAGRRITSGGSAYQRGGQGTAAAGRPVKISAGSENSFDRSPLHPHYQAK--GAAGKGSQSPAYEGKNSYDSSHGTPSR162  
Lvimineae\_CGN16202 YQPPNDIAGRRITSGGSAYQRGGQGTAAAGRPVKISAGSENSFDRSPLHPHYQAK--VSAGKGSQSPAYEGKNSYDSSHGTPSR162  
Lvimineae\_CGN17401 YQPPNDIAGRRITSGGSAYQRGGQGTAAAGRPVKISAGSENSFDRSPLHPHYQAK--VAAGKGSQSPAYEGKNSYDSSHGTPSR162  
Lindica\_consensus YQPPNDIAGRRITSGGSAYQRGGQGTAAAGRPVKISAGSENSFDRSPLHPHYQAK--VAAGKGSQSPAYEGKNSYDSSHGTPSR162  
Lperennis\_CGN09323 YQPPNDIAGRRITSGGSAYQRGGQGTAAAGRPVKISAGSENSFDRSPLHPHYQAK--AAAGKGSQSPAYEGKNSYDSSHGTPSR162  
Ltenerima\_CGN09386 YQPPNDIAGRRITSGGSAYQRGGQGTAAAGRPVKISAGSENSFDRSPLHPHYQAKAAAAGKGSQSPAYEGKNSYDSSHGTPSR164

Lsaligna\_FRA-ITA\_consensus SRMKPARGDDSPDRGAAVPRFGEWDENNPSADNYTHIFNKVREERTGSPMISGSDARPNYNIPRDQKPNKCF CFPSSK 243  
Lsaligna\_RUS-GEO\_consensus SRMKPARGDDSPDRGAAVPRFGEWDENNPSADNYTHIFNKVREERTGSPMISGSDARPNYNIPRDQKPNKCF CFPSSK 243  
Lsaligna\_ISR-ISR\_consensus SRMKPARGDDSPDRGAAVPRFGEWDENNPSADNYTHIFNKVREERTGSPMISGSDARPNYNIPRDQKPNKCF CFPSSK 243  
Lvirosa\_consensus SRMKPARGDDSPDRGAAVPRFGEWDENNPSADNYTHIFNKVREERTGSPMISGSDARPNYNIPRDQKPNKCF CFPSSK 243  
Laculeata\_consensus SRMKPARGDDSPDRGAAVPRFGEWDENNPSADNYTHIFNKVREERTGSPMISGSDARPNYNIPRDQKPNKCF CFPSSK 243  
Laltaica\_consensus SRMKPARGDDSPDRGAAVPRFGEWDENNPSADNYTHIFNKVREERTGSPMISGSDARPNYNIPRDQKPNKCF CFPSSK 243  
Ldregeana\_consensus SRMKPARGDDSPDRGAAVPRFGEWDENNPSADNYTHIFNKVREERTGSPMISGSDARPNYNIPRDQKPNKCF CFPSSK 243  
Lsativa\_consensus SRMKPARGDDSPDRGAAVPRFGEWDENNPSADNYTHIFNKVREERTGSPMISGSDARPNYNIPRDQKPNKCF CFPSSK 243  
Lserriola\_consensus SRMKPARGDDSPDRGAAVPRFGEWDENNPSADNYTHIFNKVREERTGSPMISGSDARPNYNIPRDQKPNKCF CFPSSK 243  
Ltatarica\_CGN09390\_T2a SRMKPARGDDSPDRGAAVPRFGEWDENNPSADNYTHIFNKVREERTGSPMISGSDARPNYNIPRDQKPNKCF CFPSSK 243  
Ltatarica\_CGN09390\_T2b SRMKPARGDDSPDRGAAVPRFGEWDENNPSADNYTHIFNKVREERTGSPMISGSDARPNYNIPRDQKPNKCF CFPSSK 243  
Lvimineae\_CGN16202 SRMKPARGDDSPDRGAAVPRFGEWDENNPSADNYTHIFNKVREERTGSPMISGSDARPNYNIPRDQKPNKCF CFPSSK 243  
Lvimineae\_CGN17401 SRMKPARGDDSPDRGAAVPRFGEWDENNPSADNYTHIFNKVREERTGSPMISGSDARPNYNIPRDQKPNKCF CFPSSK 243  
Lindica\_consensus SRMKPARGDDSPDRGAAVPRFGEWDENNPSADNYTHIFNKVREERTGSPMASGSDARPNYNIPRDQKPNKCF CFPSSK 243  
Lperennis\_CGN09323 SRMKPARGDDSPDRGAAVPRFGEWDENNPSADNYTHIFNKVREERTGSPMASGSDARPNYNIPRDQKPNKCF CFPSSK 243  
Ltenerima\_CGN09386 SRMKPARGDDSPDRGAAVPRFGEWDENNPSADNYTHIFNKVREERTGSPMISGSDARPNYNIPRDQKPNKCF CFPSSK 244

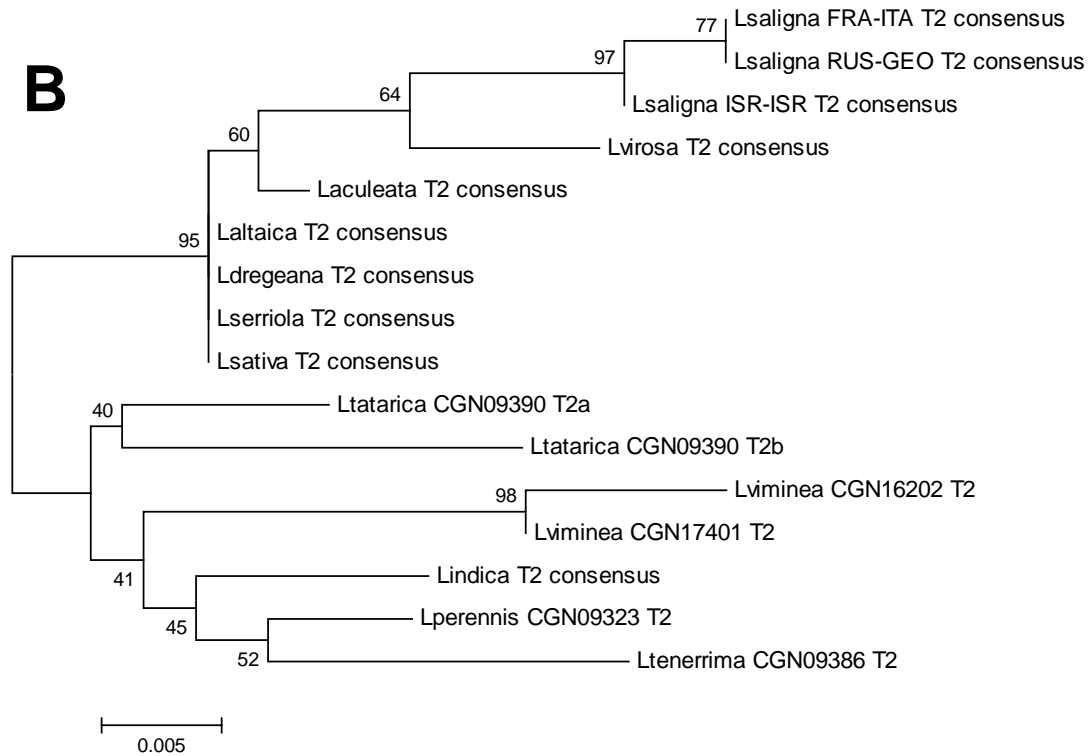

### Supplemental Figure 5. Rin4 amino acid haplotypes in *Lactuca* spp.

**(A)** For cases for which accessions within a species showed identical deduced amino acid sequences, consensus sequences are shown. The eight *L. saligna* accessions were grouped in three consensus sequences. These three haplotype groups are named according to countries of collection: FRA= France, ITA=Italy, RUS=Russia, GEO= Georgia, ISR=Israel. Details of plant material are described in Supplemental Table 6.

Conserved residues that are identical are shaded in black; highly similar residues are shaded in dark grey; quite similar residues are shaded in light grey; residues with low similarity are not shaded. Orange shaded amino acids highlight amino acid differences between *L. saligna* and the other *Lactuca* species. Green shaded amino acids highlight amino acids identical between *L. saligna* and *L. virosa* but different from the other *Lactuca* species. The blue lines represent AvrRpt2 cleavage sites in RIN4 of *A. thaliana* (Kim et al., 2005a). *L. tatarica* expressed two versions of *Rin4T2* transcript, T2a and T2b.

**(B)** Phylogenetic tree by neighbor-joining.

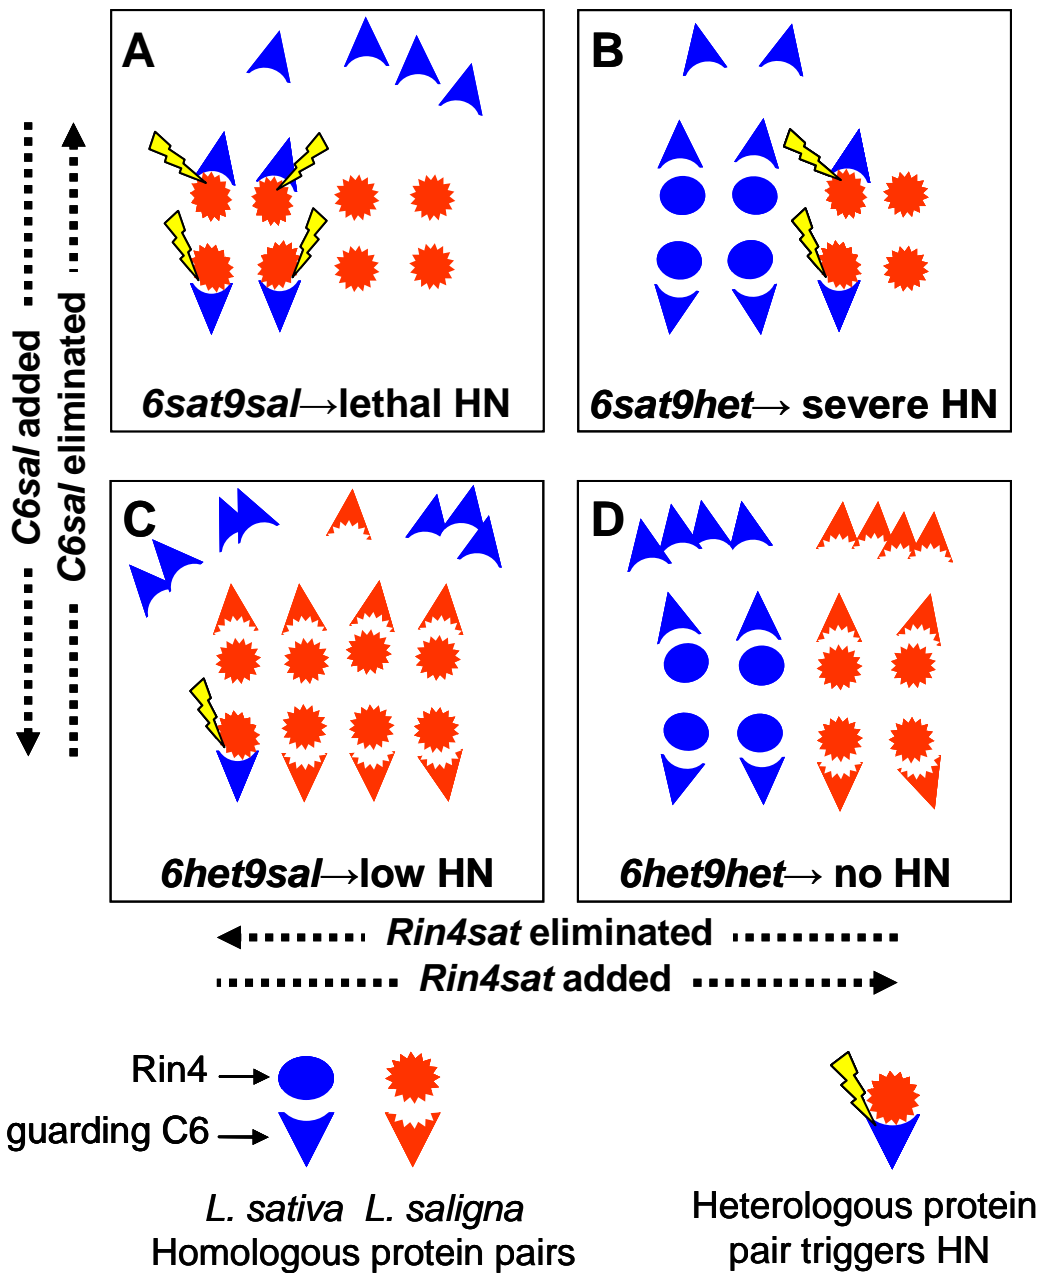

**Supplemental Figure 6. Proposed genetic and molecular model for hybrid necrosis levels in lettuce.**

The C6 protein is assumed to be a guard R protein that watches over its target protein Rin4, and when it perceives particular modifications it triggers a hypersensitive response. The C6 protein guards its homologous Rin4 better (100% guarding preference) than its heterologous Rin4 (an arbitrary 50% guarding preference). "HN" = hybrid necrosis.

**A.** C6sat senses heterologous Rin4sal with a 50% guarding preference and HN is extremely activated (lethal hybrid necrosis). **B.** C6sat proteins prefer to guard their homologous Rin4sat above Rin4sal, less Rin4sal is sensed by C6sat leading to a lower but still severe HN level. In Panel C and D double amounts of C6 proteins were drawn to better illustrate the result of guarding preference differences. **C.** Majority of Rin4sal is guarded by its homologous C6sal proteins. Occasionally, Rin4sal is sensed by C6sat and HN is activated at a low level. **D.** Rin4sat and Rin4sal are both guarded by their homologous C6 proteins; the complex is in balance and does not lead to HN.

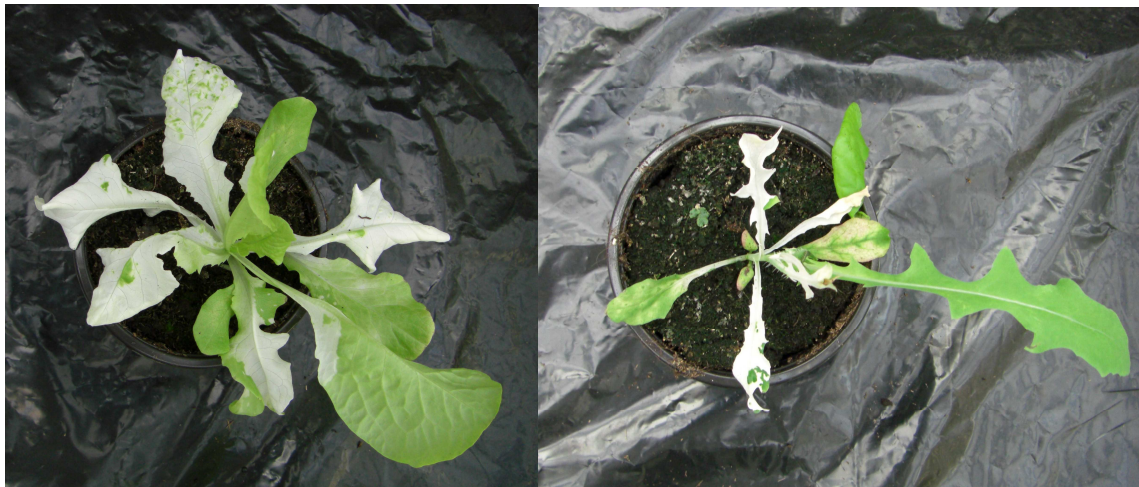

**Supplemental Figure 7. Silencing of PDS in lettuce by VIGS.**

*L. sativa* cv. Olof (left) and *L. saligna* CGN05271 (right) at 23 days after infiltration are shown. Infection with TRV-*PDS* silences endogenous *PDS* and causes inhibition of carotenoid biosynthesis resulting in the photo-bleaching phenotype.



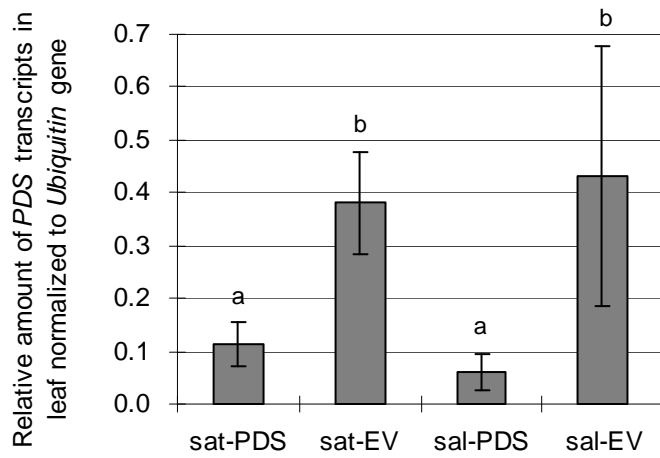

**Supplemental Figure 8. Real-time PCR expression data of *PDS* in lettuce leaves.**

mean  $\pm$  s.d., sat= *L. sativa* cv. Olof and sal= *L. saligna* CGN05271. The EV addition means plants were infiltrated with empty vector (leaves are green). The PDS addition means that the plants were infiltrated with pTRV2-*PDS* and leaves showing photo bleaching for 75%-100% leaf area were sampled; letters in common, above the error bars, indicate no significant difference between groups ( $\alpha=0.05$ , Tukey HSD test).

**Supplemental Table 1. F<sub>2</sub> segregation ratios and infection severities.**

F<sub>2</sub> segregation ratios (panel A), real infection severities to *B. lactucae* Bl:16 per genotype class (panel B) and predicted infection severities to *B. lactucae* Bl:16 per genotype class in case of normal segregation ratios (panel C) are shown. White bold numbers indicate low infection severities to Bl:16. Italic numbers indicate predicted values.

| A. Segregation ratios (in %)                                                                                  |      |      |      |                   |                        |      |      |      |                   |
|---------------------------------------------------------------------------------------------------------------|------|------|------|-------------------|------------------------|------|------|------|-------------------|
| F <sub>2</sub> cross 1                                                                                        |      |      |      |                   | F <sub>2</sub> cross 2 |      |      |      |                   |
| C9 <sup>a</sup>                                                                                               |      |      |      |                   | C9 <sup>a</sup>        |      |      |      |                   |
| C6 <sup>a</sup>                                                                                               | sat  | het  | sal  | tot               | C6 <sup>a</sup>        | sat  | het  | sal  | tot               |
| sat                                                                                                           | 10   | 11   | 0    | 28                | sat                    | 9    | 0    | 0    | 9                 |
| het                                                                                                           | 24   | 22   | 0    | 46                | het                    | 9    | 45   | 4    | 58                |
| sal                                                                                                           | 16   | 9    | 1    | 26                | sal                    | 4    | 19   | 9    | 32                |
| tot                                                                                                           | 58   | 42   | 1    | 100 <sup>b</sup>  | tot                    | 23   | 64   | 13   | 100 <sup>c</sup>  |
| B. Infection severities <sup>d</sup>                                                                          |      |      |      |                   |                        |      |      |      |                   |
| C9 <sup>a</sup>                                                                                               |      |      |      |                   | C9 <sup>a</sup>        |      |      |      |                   |
| C6 <sup>a</sup>                                                                                               | sat  | het  | sal  | tot               | C6 <sup>a</sup>        | sat  | het  | sal  | tot               |
| sat                                                                                                           | 2.19 | 0.00 |      | 1.37              | sat                    | 2.53 |      |      | 2.53              |
| het                                                                                                           | 1.96 | 0.53 |      | 1.27              | het                    | 2.33 | 0.56 | 0.00 | 0.81              |
| sal                                                                                                           | 1.94 | 1.50 | 1.13 | 1.76              | sal                    | 3.33 | 1.23 | 1.00 | 1.41              |
| tot                                                                                                           | 2.03 | 0.60 | 1.13 |                   | tot                    | 2.58 | 0.76 | 0.71 |                   |
| C. Predicted infection severity per locus in case of normal segregation ratios (1:2:1 and n=112) <sup>e</sup> |      |      |      |                   |                        |      |      |      |                   |
| C9 <sup>a</sup>                                                                                               |      |      |      |                   | C9 <sup>a</sup>        |      |      |      |                   |
| C6 <sup>a</sup>                                                                                               | sat  | het  | sal  | tot               | C6 <sup>a</sup>        | sat  | het  | sal  | tot               |
| sat                                                                                                           | 2.19 | 0.00 | 0.00 | 0.55 <sup>f</sup> | sat                    | 2.19 | 0.00 | 0.00 | 0.55 <sup>f</sup> |
| het                                                                                                           | 1.96 | 0.53 | 0.00 | 0.76 <sup>f</sup> | het                    | 1.96 | 0.53 | 0.00 | 0.76 <sup>f</sup> |
| sal                                                                                                           | 1.94 | 1.50 | 1.13 | 1.52 <sup>f</sup> | sal                    | 1.94 | 1.50 | 1.13 | 1.52 <sup>f</sup> |
| tot                                                                                                           | 2.01 | 0.64 | 0.28 |                   | tot                    | 2.01 | 0.64 | 0.28 |                   |

<sup>a</sup> Epistatic loci at Chromosome 9 (C9) around 8 cM and Chromosome 6 (C6) around 34 cM. sat=homozygous *L. sativa*, het=heterozygous, sal=homozygous *L. saligna*.

<sup>b</sup> 100% equals 113 F<sub>2</sub> plants. Thirteen F<sub>2</sub> plants out of 126 could not be classified as the genotype was unknown for one or both loci.

<sup>c</sup> 100% equals 53 F<sub>2</sub> plants. One F<sub>2</sub> plant out of 54 could not be classified as the genotype was unknown for both loci.

<sup>d</sup> Average infection severity per genotype class, based on one (cross 2) and two (cross 1) disease tests with *B. lactucae* Bl:16. Scoring classes ranged from 0-4, resistant to susceptible (class 0: no sporulation, class 1: 1-25% of leaf disc area sporulates; class 2: 26-50%; class 3: 50-75% and class 4: 75-100%(Jeuken and Lindhout, 2002).

<sup>e</sup> Predicted average infection severities per genotype class per locus. The values of the seven of the nine genotype classes are used from the real data (see above). The

values for genotype 6H9B were predicted to be 0, based on F<sub>2</sub> cross 2. The value of genotype 6sat9sal was predicted to be 0, as 6sat9het and 6sal9het were both 0. A normal segregation ratio of 1:2:1 for both loci and 112 F<sub>2</sub> individuals were used for calculations.

<sup>f</sup> In panel C , the predicted infection severities for the genotypes at the C6 locus show a larger difference between sal genotypes and the sat or het genotypes in case of normal segregation ratios than in case of the real segregation ratios in panel B. This implies that a higher LOD value at the C6 locus would possibly have been detected in case of normal segregation.

**Supplemental Table 2. Transient expression of *Rin4* alleles and transcripts;** macroscopic observations at leaf area at 8 days after infiltration. '+'= necrosis phenotype, '-'= no symptoms

| <i>Rin4</i> alleles/transcripts <sup>a</sup>                                                                     |           |           |           |                        |                        |           | controls         |                  |                          |                          |
|------------------------------------------------------------------------------------------------------------------|-----------|-----------|-----------|------------------------|------------------------|-----------|------------------|------------------|--------------------------|--------------------------|
| <b>A. <i>Rin4</i> alleles and transcripts survey</b>                                                             |           |           |           |                        |                        |           |                  |                  |                          |                          |
| Line + genetic code                                                                                              | sat<br>T1 | sat<br>T2 | sal<br>T1 | sal<br>T2 <sup>b</sup> | vir<br>T1              | vir<br>T2 | H <sub>2</sub> O | ev <sup>c</sup>  | Psoj<br>NIP <sup>d</sup> |                          |
| <i>L. sativa</i> cv. Olof                                                                                        | -         | -         | -         | +                      | -                      | -         | -                | -                | +                        |                          |
| <i>L. sativa</i> cv. Norden                                                                                      | -         | -         | -         | +                      | -                      | -         | -                | -                | +                        |                          |
| <i>L. saligna</i> CGN05271                                                                                       | -         | -         | -         | -                      | -                      | -         | -                | -                | +                        |                          |
| <i>L. saligna</i> CGN11341                                                                                       | -         | -         | -         | -                      | -                      | -         | -                | -                | +                        |                          |
| BIL6.1+9.1 <sup>e</sup>                                                                                          | 6sal9sal  | -         | -         | -                      | -                      | -         | -                | -                | +                        |                          |
| BIL6.1 <sup>f</sup>                                                                                              | 6sal9sat  | -         | -         | -                      | -                      | -         | -                | -                | +                        |                          |
| <b>B. <i>Rin4salT2</i>-associated hybrid necrosis frequency survey in genus <i>Lactuca</i> and other species</b> |           |           |           |                        |                        |           |                  |                  |                          |                          |
| Species + accession nr.                                                                                          |           |           |           |                        | sal<br>T2 <sup>b</sup> |           |                  | H <sub>2</sub> O | ev <sup>c</sup>          | Psoj<br>NIP <sup>d</sup> |
| <i>L. sativa</i> cv. Mariska                                                                                     |           |           |           |                        | +                      |           |                  | -                | -                        | +                        |
| <i>L. sativa</i> cv. Iceberg                                                                                     |           |           |           |                        | +                      |           |                  | -                | -                        | +                        |
| <i>L. sativa</i> cv. Grand Rapids                                                                                |           |           |           |                        | +                      |           |                  | -                | -                        | +                        |
| <i>L. sativa</i> cv. Asparagus                                                                                   |           |           |           |                        | +                      |           |                  | -                | -                        | +                        |
| <i>L. sativa</i> UcDm10                                                                                          |           |           |           |                        | +                      |           |                  | -                | -                        | +                        |
| <i>L. sativa</i> cv. Valmaine                                                                                    |           |           |           |                        | +                      |           |                  | -                | -                        | +                        |
| <i>L. sativa</i> CGN04734                                                                                        |           |           |           |                        | +                      |           |                  | -                | -                        | +                        |
| <i>L. sativa</i> Ninja                                                                                           |           |           |           |                        | +                      |           |                  | -                | -                        | +                        |
| <i>L. serriola</i> CGN05939                                                                                      |           |           |           |                        | -                      |           |                  | -                | -                        | +                        |
| <i>L. serriola</i> PIVT1309                                                                                      |           |           |           |                        | -                      |           |                  | -                | -                        | +                        |
| <i>L. serriola</i> CGN04796                                                                                      |           |           |           |                        | -                      |           |                  | -                | -                        | +                        |
| <i>L. serriola</i> CGN05158                                                                                      |           |           |           |                        | -                      |           |                  | -                | -                        | +                        |
| <i>L. serriola</i> CGN05784                                                                                      |           |           |           |                        | -                      |           |                  | -                | -                        | +                        |
| <i>L. serriola</i> CGN14295                                                                                      |           |           |           |                        | -                      |           |                  | -                | -                        | +                        |
| <i>L. altaica</i> CGN04664                                                                                       |           |           |           |                        | -                      |           |                  | -                | -                        | +                        |
| <i>L. saligna</i> CGN05157                                                                                       |           |           |           |                        | -                      |           |                  | -                | -                        | +                        |
| <i>L. saligna</i> CGN05314                                                                                       |           |           |           |                        | -                      |           |                  | -                | -                        | +                        |
| <i>L. saligna</i> CGN05324                                                                                       |           |           |           |                        | -                      |           |                  | -                | -                        | +                        |
| <i>L. saligna</i> CGN13330                                                                                       |           |           |           |                        | -                      |           |                  | -                | -                        | +                        |
| <i>L. saligna</i> CGN15726                                                                                       |           |           |           |                        | -                      |           |                  | -                | -                        | +                        |
| <i>L. saligna</i> CGN16244                                                                                       |           |           |           |                        | -                      |           |                  | -                | -                        | +                        |
| <i>L. saligna</i> CGN21396                                                                                       |           |           |           |                        | -                      |           |                  | -                | -                        | +                        |
| <i>L. virosa</i> CGN05869                                                                                        |           |           |           |                        | -                      |           |                  | -                | -                        | +                        |
| <i>L. virosa</i> CGN05941                                                                                        |           |           |           |                        | -                      |           |                  | -                | -                        | +                        |
| <i>L. virosa</i> CGN05978                                                                                        |           |           |           |                        | -                      |           |                  | -                | -                        | +                        |
| <i>L. virosa</i> CGN04683                                                                                        |           |           |           |                        | -                      |           |                  | -                | -                        | +                        |
| <i>L. virosa</i> CGN13362                                                                                        |           |           |           |                        | -                      |           |                  | -                | -                        | +                        |
| <i>L. virosa</i> CGN16204                                                                                        |           |           |           |                        | -                      |           |                  | -                | -                        | +                        |
| <i>L. tenerrima</i> CGN09386                                                                                     |           |           |           |                        | -                      |           |                  | -                | -                        | +                        |
| <i>L. perennis</i> CGN09323                                                                                      |           |           |           |                        | -                      |           |                  | -                | -                        | +                        |
| <i>L. viminea</i> CGN16202                                                                                       |           |           |           |                        | -                      |           |                  | -                | -                        | +                        |
| <i>L. viminea</i> CGN17401                                                                                       |           |           |           |                        | -                      |           |                  | -                | -                        | +                        |
| <i>L. indica</i> CGN14312                                                                                        |           |           |           |                        | -                      |           |                  | -                | -                        | +                        |
| <i>L. indica</i> CGN20713                                                                                        |           |           |           |                        | -                      |           |                  | -                | -                        | +                        |

|                                 |   |   |   |                |
|---------------------------------|---|---|---|----------------|
| <i>Mycelis muralis</i> CGN09327 | - | - | - | +              |
| <i>Cichorium intybus</i> L.     | - | - | - | + <sup>h</sup> |

<sup>a</sup> Alleles: sat=*L. sativa* cv. Olof, sal= *L. saligna* CGN05271, vir=*L. virosa* CGN05978.

T1 and T2 are *Rin4* transcript versions 1 and 2.

<sup>b</sup> first symptom visible 6 dpi.

<sup>c</sup> empty vector.

<sup>d</sup> first symptom visible 4 dpi, caused by *Phytophthora sojae* necrosis-inducing protein.

<sup>e</sup> like *L. sativa* cv. Olof but with *L. saligna* introgression at C6 and C9 locus respectively.

<sup>f</sup> like *L. sativa* cv. Olof but with *L. saligna* introgression at C6 locus.

<sup>h</sup> light necrosis reaction.

**Supplemental Table 3. Transient expression of *rin4* mutants.**

Six polymorphic residues between *L. saligna* CGN05271 and *L. sativa* cv. Olof at positions 85, 89, 115, 167, 217 and 234, were subject to mutagenesis. A minimum of 5 plants per treatment were used and a minimum of two experiments were performed. Macroscopic observations of necrosis at leaf area were carried out at 8 days after infiltration. '+'= necrosis phenotype, '-'= no symptoms, n.d.= not determined

| Mut. residue nr. <sup>a</sup> | <i>Rin4</i> type         | Rin4 type name <sup>b</sup>    | residue change by site-directed mutagenesis | Infiltration in           |        |
|-------------------------------|--------------------------|--------------------------------|---------------------------------------------|---------------------------|--------|
|                               |                          |                                |                                             | <i>L. sativa</i> cv. Olof | BIL6.1 |
|                               | <i>L. saligna</i> allele | Rin4T2sal                      |                                             | +                         | -      |
| 1                             | mutant                   | Rin4T2salQ-85                  | Q→P                                         | +                         | -      |
| 2                             | mutant                   | Rin4T2salT-89                  | T→N                                         | +                         | -      |
| 3                             | mutant                   | Rin4T2salQ-115                 | Q→H                                         | +                         | -      |
| 4                             | mutant                   | Rin4T2salT-167                 | T→P                                         | -                         | -      |
| 5                             | mutant                   | Rin4T2salS-217                 | S→G                                         | -                         | -      |
| 6                             | mutant                   | Rin4T2salF-234                 | F→N                                         | -                         | -      |
|                               | <i>L. sativa</i> allele  | Rin4T2sat                      |                                             | -                         | -      |
| 4                             | mutant                   | Rin4T2satP-167                 | P→T                                         | -                         | -      |
| 5                             | mutant                   | Rin4T2satG-217                 | G→S                                         | -                         | -      |
| 6                             | mutant                   | Rin4T2satN-234                 | N→F                                         | -                         | -      |
| 4+5                           | mutant                   | Rin4T2satP-167<br>+G-217       | P→T, G→S                                    | -                         | -      |
| 4+5+6                         | mutant                   | Rin4T2satP-167<br>+G-218+N-234 | P→T, G→S,<br>N→F                            | -                         | -      |
|                               |                          | empty vector                   |                                             | -                         | -      |
|                               |                          | PsojNIP <sup>c</sup>           |                                             | +                         | +      |

<sup>a</sup> Polymorphic residue number that was changed by mutagenesis.

<sup>b</sup> The number is the position of the residue in the protein. See Figure 4.

<sup>c</sup> *Phytophthora sojae* necrosis-inducing protein.

**Supplemental Table 4. *Lactuca* diversity panel <sup>a</sup>**

| <b>genus species</b>    | <b>CGN acc no,<br/>acc name <sup>b</sup></b>   | <b>orig cty <sup>c</sup></b> | <b>type</b> |
|-------------------------|------------------------------------------------|------------------------------|-------------|
| <i>Lactuca sativa</i>   | CGN05127, Olof <sup>de</sup>                   | Netherlands                  | butterhead  |
| <i>Lactuca sativa</i>   | CGN13390, Norden <sup>d</sup>                  | Netherlands                  | butterhead  |
| <i>Lactuca sativa</i>   | CGN10966, Mariska <sup>d</sup>                 | Netherlands                  | butterhead  |
| <i>Lactuca sativa</i>   | CGN04619, Iceberg <sup>de</sup>                | United States<br>of America  | crisp       |
| <i>Lactuca sativa</i>   | CGN09352,<br>Grand Rapids <sup>d</sup>         | United States<br>of America  | crisp       |
| <i>Lactuca sativa</i>   | Asparagus, huayesun <sup>de</sup>              | China                        | stalk       |
| <i>Lactuca sativa</i>   | CGN11339, UCDm10 <sup>de</sup>                 | unknown                      | latin       |
| <i>Lactuca sativa</i>   | CGN05249, Valmaine <sup>de</sup>               | United States<br>of America  | cos         |
| <i>Lactuca sativa</i>   | CGN04734 <sup>de</sup>                         | Iran                         | cutting     |
| <i>Lactuca sativa</i>   | CGN04688,<br>Meikoningin <sup>e</sup>          | Germany                      | butterhead  |
| <i>Lactuca sativa</i>   | CGN05235,<br>Blonde Lent a Monter <sup>e</sup> | France                       | cos         |
| <i>Lactuca sativa</i>   | CGN20716, Ninja <sup>d</sup>                   | Netherlands                  | butterhead  |
| <i>Lactuca serriola</i> | CGN04774 <sup>e</sup>                          | Egypt                        | oilseed     |
| <i>Lactuca serriola</i> | CGN05939 <sup>de</sup>                         | Israel                       |             |
| <i>Lactuca serriola</i> | CGN05099, PIVT1309 <sup>d</sup>                | Israel                       |             |
| <i>Lactuca serriola</i> | CGN04796 <sup>de</sup>                         | Iraq                         |             |
| <i>Lactuca serriola</i> | CGN05158 <sup>de</sup>                         | Norway                       |             |
| <i>Lactuca serriola</i> | CGN05784 <sup>de</sup>                         | Slovenia                     |             |
| <i>Lactuca serriola</i> | CGN14295 <sup>de</sup>                         | Portugal                     |             |
| <i>Lactuca altaica</i>  | CGN15711 <sup>e</sup>                          | Georgia                      |             |
| <i>Lactuca altaica</i>  | CGN04664 <sup>de</sup>                         | unknown                      |             |
| <i>Lactuca dregeana</i> | CGN04790 <sup>e</sup>                          | unknown                      |             |
| <i>Lactuca dregeana</i> | CGN05805 <sup>e</sup>                          | unknown                      |             |
| <i>Lactuca aculeata</i> | CGN09357 <sup>e</sup>                          | Israel                       |             |
| <i>Lactuca aculeata</i> | CGN15692 <sup>e</sup>                          | Turkey                       |             |
| <i>Lactuca saligna</i>  | CGN05271 <sup>de</sup>                         | France                       |             |
| <i>Lactuca saligna</i>  | CGN05157 <sup>de</sup>                         | Italy                        |             |
| <i>Lactuca saligna</i>  | CGN05314 <sup>de</sup>                         | Israel                       |             |
| <i>Lactuca saligna</i>  | CGN05324 <sup>de</sup>                         | Israel                       |             |
| <i>Lactuca saligna</i>  | CGN11341 <sup>de</sup>                         | unknown                      |             |
| <i>Lactuca saligna</i>  | CGN13330 <sup>d</sup>                          | Turkey                       |             |
| <i>Lactuca saligna</i>  | CGN15726 <sup>de</sup>                         | Russia                       |             |
| <i>Lactuca saligna</i>  | CGN15705 <sup>e</sup>                          | Georgia                      |             |
| <i>Lactuca saligna</i>  | CGN16244 <sup>d</sup>                          | Spain                        |             |
| <i>Lactuca saligna</i>  | CGN21396 <sup>d</sup>                          | Great Britain                |             |
| <i>Lactuca saligna</i>  | 275-5 <sup>ef</sup>                            | France                       |             |
| <i>Lactuca virosa</i>   | CGN05869 <sup>de</sup>                         | Netherlands                  |             |
| <i>Lactuca virosa</i>   | CGN05941 <sup>de</sup>                         | Israel                       |             |
| <i>Lactuca virosa</i>   | CGN05978 <sup>de</sup>                         | Germany                      |             |
| <i>Lactuca virosa</i>   | CGN04683 <sup>de</sup>                         | Netherlands                  |             |
| <i>Lactuca virosa</i>   | CGN13362 <sup>de</sup>                         | France                       |             |
| <i>Lactuca virosa</i>   | CGN16204 <sup>de</sup>                         | Russia                       |             |

|                             |                        |             |
|-----------------------------|------------------------|-------------|
| <i>Lactuca viminea</i>      | CGN16202 <sup>de</sup> | Armenia     |
| <i>Lactuca viminea</i>      | CGN17401 <sup>de</sup> | France      |
| <i>Lactuca tatarica</i>     | CGN09390 <sup>e</sup>  | Russia      |
| <i>Lactuca indica</i>       | CGN14312 <sup>de</sup> | Indonesia   |
| <i>Lactuca indica</i>       | CGN20713 <sup>de</sup> | China       |
| <i>Lactuca tenerrima</i>    | CGN09386 <sup>de</sup> | Spain       |
| <i>Lactuca perennis</i>     | CGN09323 <sup>de</sup> | Swiss       |
| <i>Mycelis muralis</i>      | CGN09327 <sup>d</sup>  | Italy       |
| <i>Cichorium intybus</i> L. | wag07 <sup>dg</sup>    | Netherlands |

<sup>a</sup> taxonomical relationships and geographical distributions of wild *Lactuca* species are described in Lebeda et al., 2004.

<sup>b</sup> accession number in the lettuce collection of the Centre for Genetic Resources, the Netherlands (CGN), <http://www.cgn.wur.nl>, additional specifications available.

<sup>c</sup> country where the sample was collected or derived.

<sup>d</sup> used in Rin4salT2 transient expression studies.

<sup>e</sup> used for *Rin4* cDNA sequencing.

<sup>f</sup> provided by A. Beharav from the University of Haifa and collected by Prof. Nevo on the isle of Corsica, France.

<sup>g</sup> collected by MJW Jeuken at Wageningen, The Netherlands.

| <b>Supplemental Table 5. <i>L. sativa</i>-<i>L. saligna</i> hybrid material</b> |                        |                                                                                                                                                                          |
|---------------------------------------------------------------------------------|------------------------|--------------------------------------------------------------------------------------------------------------------------------------------------------------------------|
| <b>genotype</b>                                                                 | <b>accessions</b>      | <b>features</b>                                                                                                                                                          |
| <i>L. sativa</i>                                                                | cv. Olof<br>cv. Norden | Cultivated lettuce species, host for downy mildew, Olof harbors no known <i>R</i> genes and is susceptible to race Bl:1-Bl:24, Norden harbors <i>Dm3</i> and <i>Dm11</i> |
| <i>L. saligna</i>                                                               | CGN05271<br>CGN11341   | Wild lettuce species, nonhost to downy mildew                                                                                                                            |
| <i>L. virosa</i>                                                                | CGN05978               | Wild lettuce species                                                                                                                                                     |
| preBIL9.1b                                                                      | Background cv. Olof    | Hybrid necrosis phenotype, Heterozygous <i>L. saligna</i> introgression on C9                                                                                            |
| BIL6.1                                                                          | Background cv. Olof    | Homozygous <i>L. saligna</i> introgression on C6                                                                                                                         |
| BIL4.4                                                                          | Background cv. Olof    | Homozygous <i>L. saligna</i> introgression on C4, super susceptible to downy mildew                                                                                      |



**Supplemental Table 6. DNA markers at C6 and C9 loci**

| Marker name <sup>a</sup> | Restrict enzyme | forward primer                 | reverse primer            |
|--------------------------|-----------------|--------------------------------|---------------------------|
| <b>C6 locus</b>          |                 |                                |                           |
| LE1134                   |                 | AGGATCAAATCCGTGTCAGC           | TGTGTTGAAAGAAGCATGGG      |
| CLX_S3_14099             |                 | AGAAGCAAGCTCCATGAGGA           | TAGTCGGAAAACGCCAGTTC      |
| LE0395                   | Ddel            | GCGTGATGTCGCTTTGTTAAT          | ACAGTGAGTGTGTCGCAAGG      |
| LE0414                   |                 | CGATTGGGAACACATGTCAG           | TCCTAAAGAACCACGCAACG      |
| NL1010                   |                 | CTTCCCAATCTGAAAGCTG            | CAAATGCATAAGGGAGCAC       |
| KLK1127                  |                 | GCAACACCACTTCGGATTCT           | CCATGAAAATTGCAAGAAAACA    |
| LE0060                   | Rsal            | GGCACATCTGCAAGAAACAA           | ATTGTGCCCAAATCTGAAG       |
| LE0138                   | Hinfl           | GGGCTGTAGCTGGTGTGTTGT          | CCAGCTAAAGATCTGCGCTC      |
| CLX_S3_357               |                 | GGTGACACCTGATGGGAGTT           | CTTTTGAAGCAGACGTGCAG      |
| QGG10J06                 |                 | GGCAACCAAGAAACAGAACC           | TGTGGGAGGGATGTGATGTA      |
| QGJ12P21                 |                 | TGGGCATCGATAATTCCATT           | GTGGCCTTGAGAACCAAAAA      |
| QGG21B18                 |                 | CCCAAGTCACCTTCCACTGT           | CAGTTGTATCCCCTGCCATC      |
| CLX_S3_1404              |                 | CCAATGGAAAATTTGGTTGC           | CCTCTCAAGTGCAGGTAGCC      |
| LE1198                   |                 | GAGTGTAGCTGCAGTGGCAA           | TCCTGCAGTACCAGCAACAG      |
| LE0338                   | Alul            | GGAAATAAACCATCGAGCCA           | TTCAGATTATTCAAATGACGATTTA |
| <b>C9 locus</b>          |                 |                                |                           |
| NL0656                   |                 | GCAATGGAGATGAAAGAGC            | TTTTTGGTTTCACTTTCCGG      |
| LE1109                   |                 | GGACGTTCAAATCCAGCAAT           | GCAAATCAGCCGATAAATCC      |
| M283                     |                 | ATGTGTCTGGGGTGGCTTTA           | TTGCCCCATAATCATAAAGAATG   |
| LE7020                   | Hinfl           | CGCTGTCATCGGAGTTGTAA           | CCAGTGGAAATTTGGGAAGAA     |
| NL0279                   |                 | AGCTTGACCAGTTCCACAG            | GTCCTTTCTGACTCCTCCC       |
| LE0478 <sup>b</sup>      | HinclI          | GCATATGGCCCATGAATTCTCGG        | GCCCTTTAGAGCTATTCACAACA   |
| LE0478indel              |                 | ATAGACCAAATTGCCGTCCA           | CCCCTTTCAATTTTGATCGT      |
| LE0478INT                |                 | GGTAAAACCGGTGGGAAGAT           | TTGGTCACGTGGAATGTTGT      |
| NL0919                   |                 | CTGAGGGTTGCTCTTTCTG            | TGTTCAATTCAAAGTTAACCAC    |
| LE0329                   | ApoI            | GGATATCAACGATCGGAGGA           | GTTATCGCTGGCCTCAAGTC      |
| LE3008                   | MseI            | CATGCTGAACTCCACGTAACA          | CAAATCCCTGCAGCAATAGA      |
| LE7027                   | MnII            | CTATCGCCGGACTATGGAAA           | GCATTAGGACGGATGATGCT      |
| KLK1133                  |                 | AGGCAGAACACCAACTCCAG           | CTCCTTGTGTTGGGAAGA        |
| LE1019                   |                 | TTTTTCCCGATCTTTGCATC           | AGCGAATCTTTGCTTTTTTCG     |
| KLK1115dCAPs             | HindIII         | GAAGATGGATATTGAAGTTCTGGACAAGCT | ACCCATCACCAAGAATCCA       |
| M431dCAPs                | Ddel            | GATCGATCGTTCATCGTTCTCTCA       | TTGTTGAAACAAGTTCACTATTTGG |
| M3636                    |                 | CCAGAGACATTCCACAAGCA           | CAACAACACGATAATGGGACA     |
| LK1501                   | NlaIII          | GTTGAACATGCGGTGCTTTG           | TAAATCCTCCCATGCAGGTC      |
| LE0361                   | MnII            | GCAGCAATCGATTTTGTATCC          | TTGTGCCGATATGTTCACT       |
| LE0007                   | HinclI          | AGGCCGACGTGTTTTATTTG           | TCCTTGACTCAGTGCCCTCCT     |

<sup>a</sup> For markers that start their name with M, LE or LK primers were originally designed on EST contigs in the Compositae Genome Project Database (CGPDB). For markers that start with KLK we designed new primers on EST contigs from the Compositae Genome Project Database. Marker names starting with NL are SSR markers.

<sup>b</sup> LE0478 is the original primer pair derived from CGPDB; LE0478INT and LE0478indel were developed on additional sequence information of lettuce *Rin4*.

| <b>Supplemental Table 7. Primer pairs for <i>Rin4</i> sequencing, cloning and RT-PCR</b> |                           |                          |                                 |
|------------------------------------------------------------------------------------------|---------------------------|--------------------------|---------------------------------|
|                                                                                          | <b>Forward primer</b>     | <b>Reverse primer</b>    | <b>begin-end bp<sup>a</sup></b> |
| <b>Sequencing <i>Rin4</i> cDNA and gDNA</b>                                              |                           |                          |                                 |
| Rin4_UTR                                                                                 | CGGATTTCTTTCAAGCTTCTTC    | GCCCTTTAGAGCTATTCACAACA  |                                 |
| Rin4_INT1                                                                                | CAGACCTCAACCGGAAGAAC      | TATGTTTCACCGGACGACCT     | 183-346                         |
| Rin4_INT2                                                                                | CCATGGGACTCCCTCTAGGT      | TGATACTCATTCTCTCCCTGCT   | 488-229                         |
| Rin4_INT3                                                                                | GGTAAAACCGGTGGGAAGAT      | TTGGTCACGTGGAATGTTGT     | 91-667                          |
| Rin4_TOT                                                                                 | ATGGCGCAGCGTCCAAGTGA      | TCACTTCGACIATGGGAAG      | 0-732/735                       |
| Rin4_END                                                                                 | GTTTGGTGAGTGGGATGAAAACAA  | TCACTTCGACIATGGGAAG      | 546-732/735                     |
| Rin4_STA                                                                                 | ATGGCGCAGCGTCCAAGTGA      | GACAGTTCTTCCGGTTGAG      | 0-208                           |
| <b>Agro-assay fragment cloning</b>                                                       |                           |                          |                                 |
| Rin4-topoall                                                                             | CACCATGGCGCAGCGTCCAAGT    | TCACTTCGACIATGGGAAG      |                                 |
| <b>VIGS and RT-PCR</b>                                                                   |                           |                          |                                 |
| Is-PDS1 <sup>b</sup>                                                                     | TACCCGAAGAATGGAAACCA      | CAGCTGCAATTTTCATCAGGA    |                                 |
| Is-PDS-RT3 <sup>c</sup>                                                                  | CCACCCACCATAACATCCATTGAG  | TGGCAGAAACATTTCCAAACAGAG |                                 |
| Is-Ubiquitin <sup>c</sup>                                                                | GAAGAAGACCTACACCAAGCCAAAG | ACTCAGCATTAGGGCACTCTTCC  |                                 |

<sup>a</sup> beginning and ending base pair number of PCR product of cDNA sequence *Rin4*.

<sup>b</sup> primer pair used for fragment cloning in pTRV2 for VIGS.

<sup>c</sup> primer pair used in RT-PCR on VIGS-silenced plants.
